# Supplementary figures and images for: Engineering targeted chromosomal amplifications in human breast epithelial cells
Source: Springer Nature journal article supplement (doi:10.1007/s10549-015-3468-2), 2015-06-22

Supplemental Figure 3.

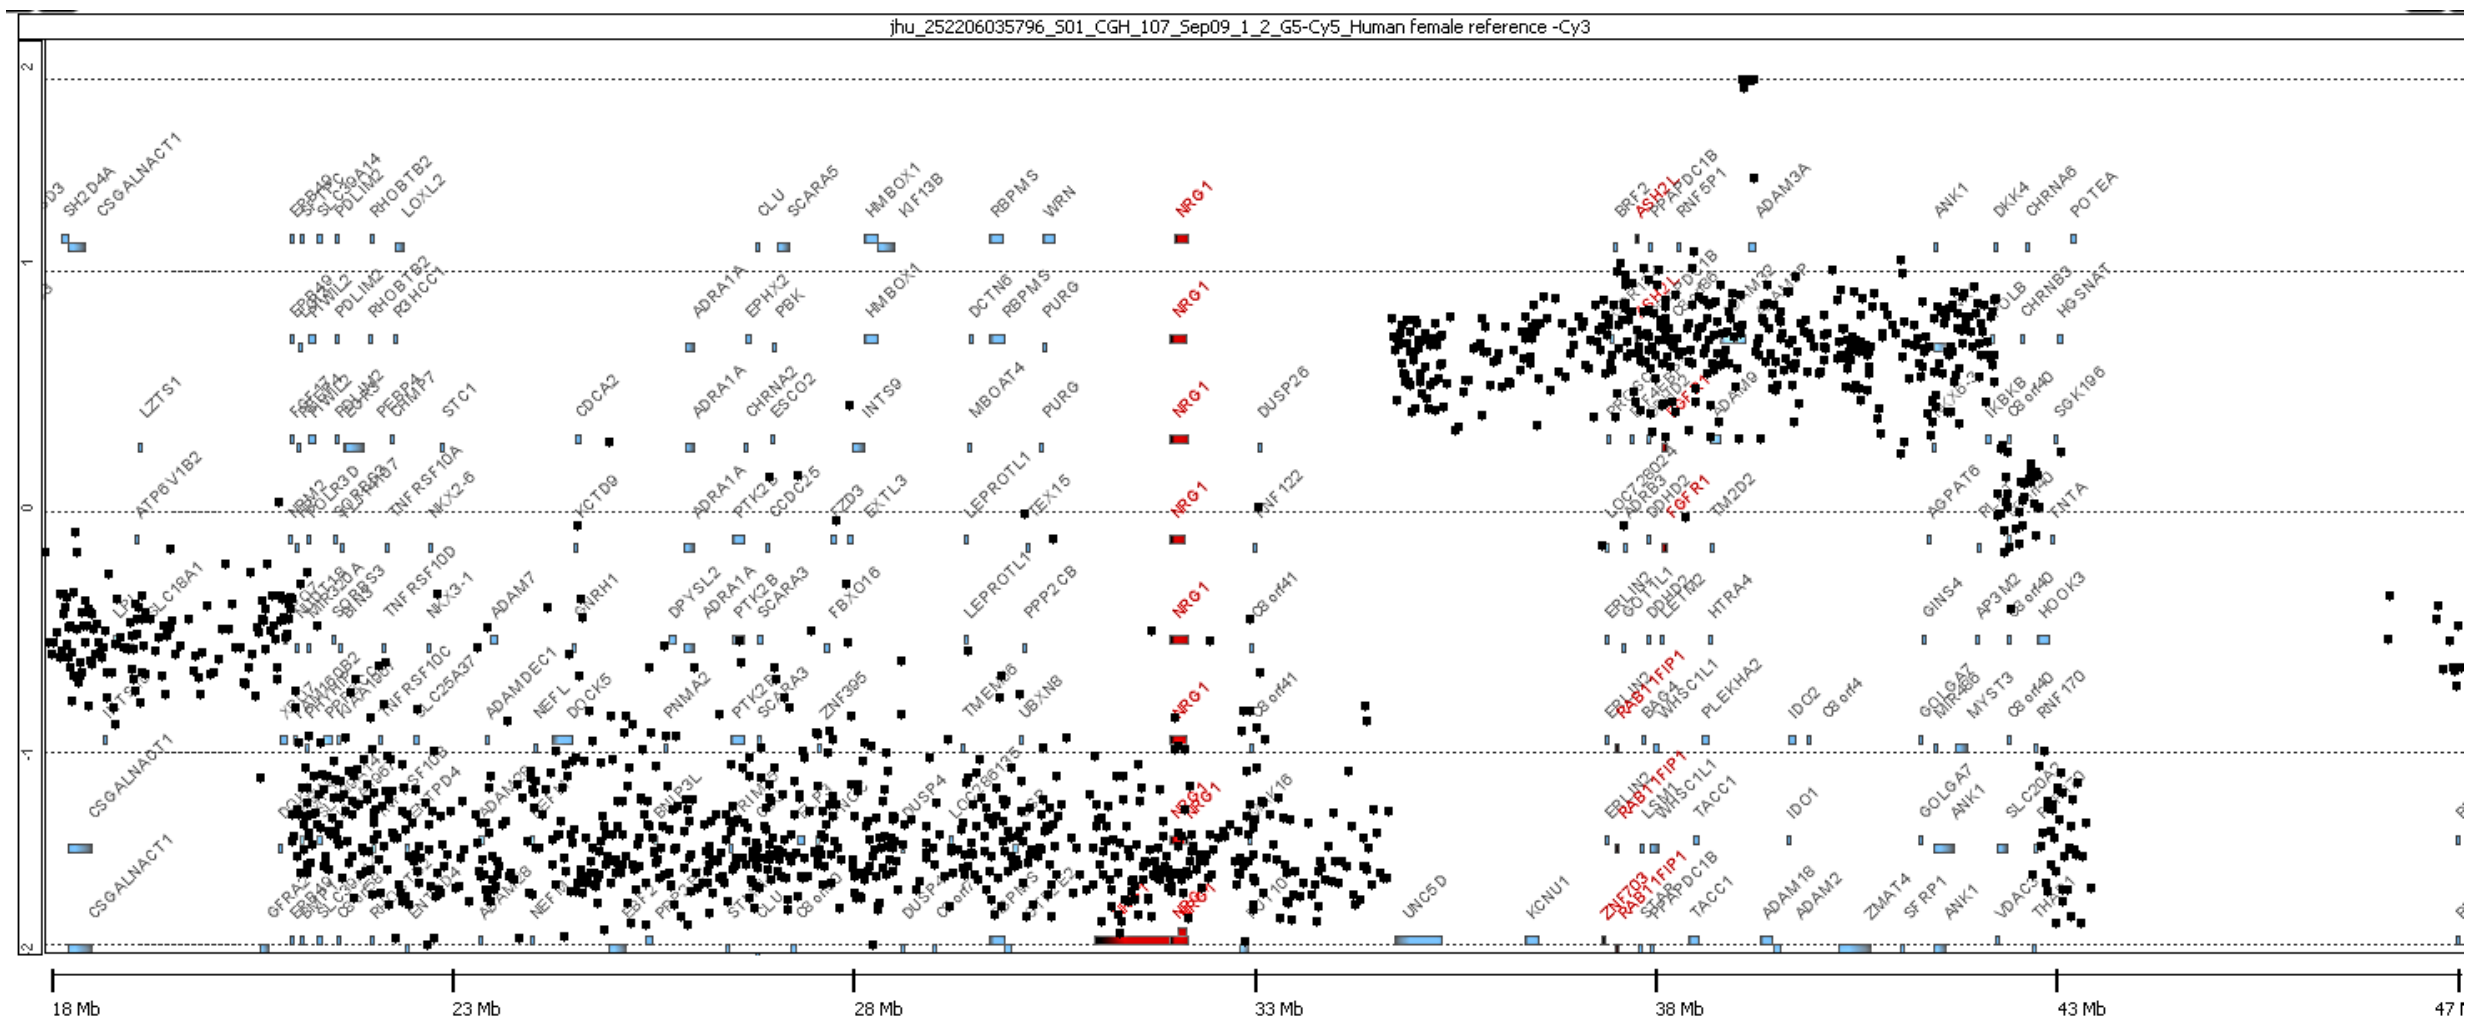

Supplemental Figure 4.

MCF-7

38C-3

E8

F3

G5

ZNF703

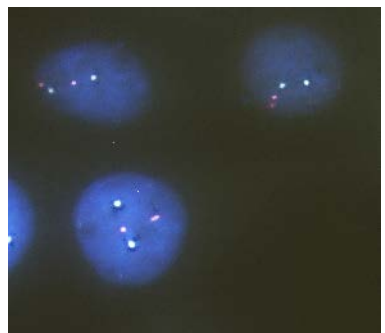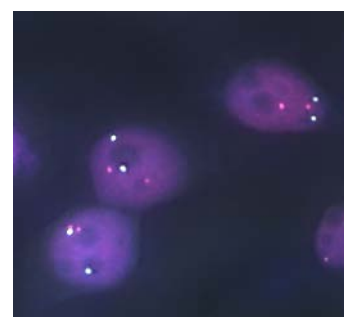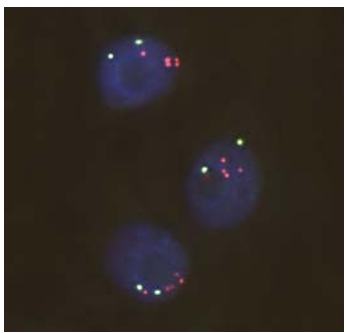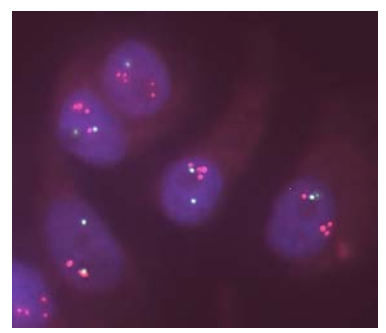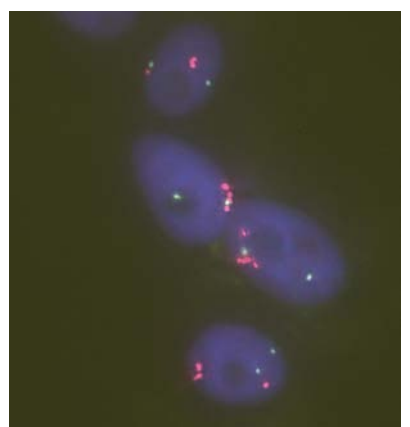

FGFR1

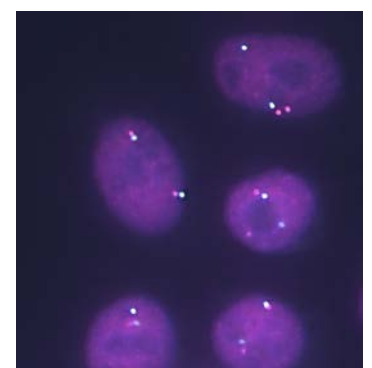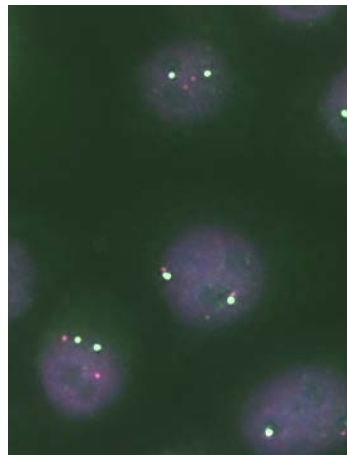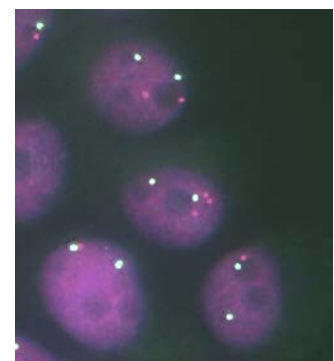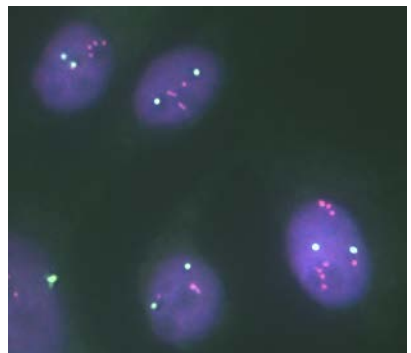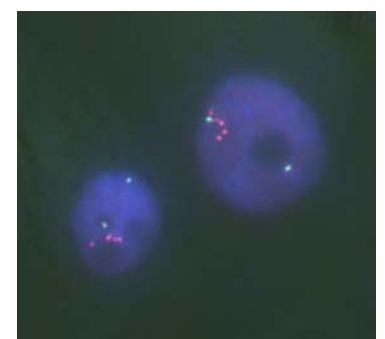

NRG1

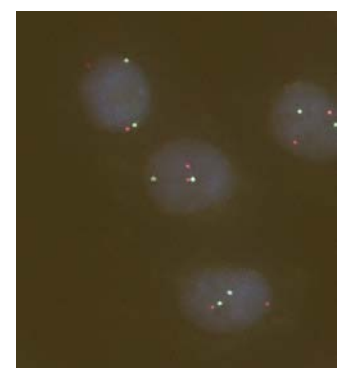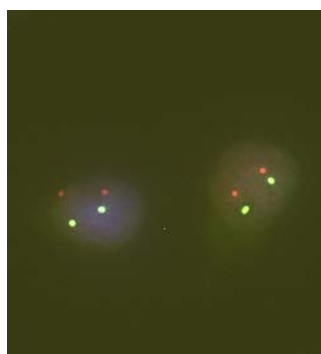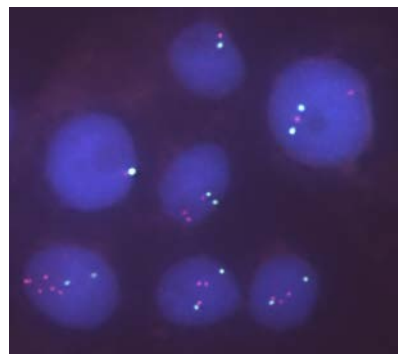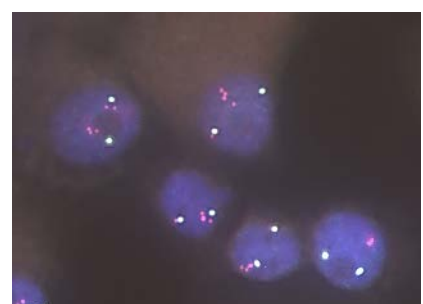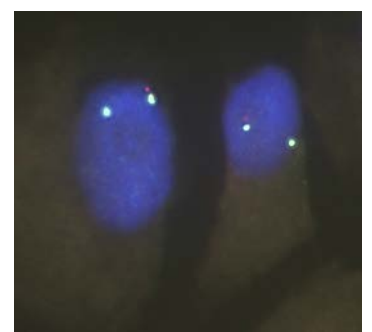

Supplement: MOESM2 [file 8847310]
